# Supplementary material for: Sublingual Buprenorphine-Naloxone Compared With Injection Naltrexone for Opioid Use Disorder: Potential Utility of Patient Characteristics in Guiding Choice of Treatment
Source: Atypon-hosted journal article supplement (doi:10.1176/appi.ajp.2020.20060816), 2021-06-25
Supplement: appi.ajp.2020.20060816.ds001.pdf [file appi.ajp.2020.20060816.ds001.pdf]

**Supplemental Table S1.** Full summary of moderators of medication treatment effect (extended-release naltrexone vs buprenorphine-naloxone) on Relapse (vs No Relapse) across the 24-week Trial for the All Randomized sample (N=570, left side) and for the Per Protocol sample (N = 474, right side) who successfully initiated study medication.

| Moderator Variable <sup>a</sup>         | All Randomized Sample<br>(N=570)         |           |       |                            |               | Per Protocol Sample<br>(N=474)           |           |       |                            |            |
|-----------------------------------------|------------------------------------------|-----------|-------|----------------------------|---------------|------------------------------------------|-----------|-------|----------------------------|------------|
|                                         | Treatment by<br>Moderator<br>Interaction |           |       | Treatment<br>Effect        |               | Treatment by<br>Moderator<br>Interaction |           |       | Treatment<br>Effect        |            |
|                                         | F                                        | DF        | P     | Odds<br>Ratio <sup>b</sup> | 95% CI        | F                                        | DF        | p     | Odds<br>Ratio <sup>b</sup> | 95% CI     |
| <b>Demographics</b>                     |                                          |           |       |                            |               |                                          |           |       |                            |            |
| Gender                                  | 0.05                                     | 1,<br>559 | 0.824 |                            |               | <.01                                     | 1,<br>463 | 0.941 |                            |            |
| Male                                    |                                          |           |       | 1.48                       | 0.98,<br>2.23 |                                          |           |       | 0.87                       | 0.56, 1.35 |
| Female                                  |                                          |           |       | 1.36                       | 0.73,<br>2.54 |                                          |           |       | 0.89                       | 0.46, 1.73 |
| Age (continuous) (Mean (SD)=33.9 (9.6)) | 1.11                                     | 1,<br>559 | 0.292 |                            |               | 0.10                                     | 1,<br>463 | 0.752 |                            |            |
| at 24.2                                 |                                          |           |       | 1.21                       | 0.74,<br>1.98 |                                          |           |       | 0.83                       | 0.49, 1.39 |
| at 33.9                                 |                                          |           |       | 1.45                       | 1.03,<br>2.05 |                                          |           |       | 0.88                       | 0.60, 1.27 |
| at 43.5                                 |                                          |           |       | 1.75                       | 1.08,<br>2.83 |                                          |           |       | 0.93                       | 0.55, 1.59 |
| Age                                     | 2.29                                     | 1,<br>559 | 0.131 |                            |               | 0.67                                     | 1,<br>463 | 0.414 |                            |            |
| ≤25                                     |                                          |           |       | 0.83                       | 0.36,<br>1.89 |                                          |           |       | 0.64                       | 0.27, 1.50 |
| >25                                     |                                          |           |       | 1.67                       | 1.14,<br>2.44 |                                          |           |       | 0.95                       | 0.63, 1.43 |
| Hispanic                                | 3.27                                     | 1,<br>559 | 0.071 |                            |               | 1.03                                     | 1,<br>463 | 0.311 |                            |            |
| Not Hispanic                            |                                          |           |       | 1.25                       | 0.86,<br>1.82 |                                          |           |       | 0.81                       | 0.54, 1.21 |
| Hispanic                                |                                          |           |       | 3.07                       | 1.25,<br>7.49 |                                          |           |       | 1.38                       | 0.53, 3.60 |
| Race                                    | 0.53                                     | 2,<br>557 | 0.592 |                            |               | 0.24                                     | 2,<br>461 | 0.783 |                            |            |
| White Only                              |                                          |           |       | 1.36                       | 0.92,<br>2.02 |                                          |           |       | 0.91                       | 0.60, 1.39 |
| Black Only                              |                                          |           |       | 1.16                       | 0.38,<br>3.55 |                                          |           |       | 0.58                       | 0.17, 1.93 |
| Other                                   |                                          |           |       | 2.17                       | 0.90,<br>5.25 |                                          |           |       | 0.89                       | 0.33, 2.39 |

| Moderator Variable <sup>a</sup> | All Randomized Sample<br>(N=570)         |           |       |                            |               | Per Protocol Sample<br>(N=474)           |           |       |                            |            |
|---------------------------------|------------------------------------------|-----------|-------|----------------------------|---------------|------------------------------------------|-----------|-------|----------------------------|------------|
|                                 | Treatment by<br>Moderator<br>Interaction |           |       | Treatment<br>Effect        |               | Treatment by<br>Moderator<br>Interaction |           |       | Treatment<br>Effect        |            |
|                                 | F                                        | DF        | P     | Odds<br>Ratio <sup>b</sup> | 95% CI        | F                                        | DF        | p     | Odds<br>Ratio <sup>b</sup> | 95% CI     |
| Education                       | 0.24                                     | 2,<br>557 | 0.785 |                            |               | 0.54                                     | 2,<br>461 | 0.582 |                            |            |
| <HS                             |                                          |           |       | 1.78                       | 0.86,<br>3.68 |                                          |           |       | 1.26                       | 0.59, 2.69 |
| HS/GED                          |                                          |           |       | 1.30                       | 0.78,<br>2.17 |                                          |           |       | 0.79                       | 0.45, 1.38 |
| >HS                             |                                          |           |       | 1.49                       | 0.81,<br>2.74 |                                          |           |       | 0.80                       | 0.41, 1.53 |
| Employment                      | 0.90                                     | 1,<br>559 | 0.343 |                            |               | 2.24                                     | 1,<br>463 | 0.135 |                            |            |
| Not Employed                    |                                          |           |       | 1.27                       | 0.82,<br>1.96 |                                          |           |       | 0.70                       | 0.44, 1.12 |
| Other                           |                                          |           |       | 1.79                       | 1.02,<br>3.13 |                                          |           |       | 1.25                       | 0.69, 2.28 |
| <b>Opioid Use</b>               |                                          |           |       |                            |               |                                          |           |       |                            |            |
| Primary Opioid                  | 0.13                                     | 1,<br>542 | 0.722 |                            |               | <.01                                     | 1,<br>448 | 0.961 |                            |            |
| Heroin                          |                                          |           |       | 1.40                       | 0.96,<br>2.05 |                                          |           |       | 0.81                       | 0.54, 1.23 |
| Opioid Analgesics               |                                          |           |       | 1.19                       | 0.52,<br>2.73 |                                          |           |       | 0.83                       | 0.34, 2.01 |
| Any current heroin use          | 2.35                                     | 1,<br>559 | 0.126 |                            |               | 3.15                                     | 1,<br>463 | 0.076 |                            |            |
| No                              |                                          |           |       | 2.94                       | 1.11,<br>7.80 |                                          |           |       | 2.05                       | 0.74, 5.65 |
| Yes                             |                                          |           |       | 1.30                       | 0.90,<br>1.88 |                                          |           |       | 0.76                       | 0.51, 1.14 |
| Any current intravenous use     | 2.78                                     | 1,<br>559 | 0.096 |                            |               | 1.74                                     | 1,<br>463 | 0.188 |                            |            |
| No                              |                                          |           |       | 2.20                       | 1.20,<br>4.04 |                                          |           |       | 1.25                       | 0.65, 2.40 |
| Yes                             |                                          |           |       | 1.18                       | 0.78,<br>1.79 |                                          |           |       | 0.74                       | 0.47, 1.15 |
| Any current methadone use       | 0.60                                     | 1,<br>559 | 0.440 |                            |               | 0.49                                     | 1,<br>463 | 0.486 |                            |            |
| No                              |                                          |           |       | 1.37                       | 0.95,<br>1.99 |                                          |           |       | 0.83                       | 0.56, 1.24 |
| Yes                             |                                          |           |       | 2.01                       | 0.82,<br>4.92 |                                          |           |       | 1.21                       | 0.46, 3.19 |



| Moderator Variable <sup>a</sup>                             | All Randomized Sample<br>(N=570)         |           |       |                            |               | Per Protocol Sample<br>(N=474)           |           |       |                            |            |
|-------------------------------------------------------------|------------------------------------------|-----------|-------|----------------------------|---------------|------------------------------------------|-----------|-------|----------------------------|------------|
|                                                             | Treatment by<br>Moderator<br>Interaction |           |       | Treatment<br>Effect        |               | Treatment by<br>Moderator<br>Interaction |           |       | Treatment<br>Effect        |            |
|                                                             | F                                        | DF        | P     | Odds<br>Ratio <sup>b</sup> | 95% CI        | F                                        | DF        | p     | Odds<br>Ratio <sup>b</sup> | 95% CI     |
| Alcohol                                                     | 1.42                                     | 1,<br>559 | 0.234 |                            |               | 0.82                                     | 1,<br>463 | 0.366 |                            |            |
| Non-user/None                                               |                                          |           |       | 1.62                       | 1.08,<br>2.44 |                                          |           |       | 0.96                       | 0.62, 1.48 |
| Mild/Mod/Severe                                             |                                          |           |       | 1.03                       | 0.54,<br>1.94 |                                          |           |       | 0.66                       | 0.33, 1.32 |
| Amphetamines                                                | 0.14                                     | 1,<br>559 | 0.711 |                            |               | 0.05                                     | 1,<br>463 | 0.816 |                            |            |
| Non-user/None                                               |                                          |           |       | 1.48                       | 1.01,<br>2.16 |                                          |           |       | 0.85                       | 0.57, 1.28 |
| Mild/Mod/Severe                                             |                                          |           |       | 1.25                       | 0.56,<br>2.79 |                                          |           |       | 0.95                       | 0.41, 2.23 |
| Benzodiazepine/other sedative                               | 0.31                                     | 1,<br>559 | 0.580 |                            |               | <.01                                     | 1,<br>463 | 0.970 |                            |            |
| Non-user/None                                               |                                          |           |       | 1.55                       | 1.04,<br>2.31 |                                          |           |       | 0.88                       | 0.57, 1.35 |
| Mild/Mod/Severe                                             |                                          |           |       | 1.24                       | 0.63,<br>2.43 |                                          |           |       | 0.89                       | 0.44, 1.82 |
| Cannabis                                                    | 0.14                                     | 1,<br>559 | 0.707 |                            |               | 0.64                                     | 1,<br>463 | 0.424 |                            |            |
| Non-user/None                                               |                                          |           |       | 1.38                       | 0.92,<br>2.07 |                                          |           |       | 0.79                       | 0.51, 1.22 |
| Mild/Mod/Severe                                             |                                          |           |       | 1.59                       | 0.84,<br>3.02 |                                          |           |       | 1.10                       | 0.55, 2.17 |
| Cocaine                                                     | 4.40                                     | 1,<br>559 | 0.036 |                            |               | 2.35                                     | 1,<br>463 | 0.126 |                            |            |
| Non-user/None                                               |                                          |           |       | 1.82                       | 1.20,<br>2.77 |                                          |           |       | 1.05                       | 0.67, 1.64 |
| Mild/Mod/Severe                                             |                                          |           |       | 0.83                       | 0.45,<br>1.52 |                                          |           |       | 0.56                       | 0.29, 1.09 |
| <b>History of Substance Use</b>                             |                                          |           |       |                            |               |                                          |           |       |                            |            |
| Age at onset nicotine use (years)<br>(Mean (SD)=15.8 (5.1)) | <.01                                     | 1,<br>530 | 0.967 |                            |               | 0.35                                     | 1,<br>438 | 0.556 |                            |            |
| at 10.7                                                     |                                          |           |       | 1.43                       | 0.87,<br>2.36 |                                          |           |       | 0.97                       | 0.56, 1.67 |
| at 15.8                                                     |                                          |           |       | 1.44                       | 1.02,<br>2.05 |                                          |           |       | 0.86                       | 0.59, 1.26 |
| at 20.9                                                     |                                          |           |       | 1.45                       | 0.88,<br>2.41 |                                          |           |       | 0.76                       | 0.44, 1.34 |

| Moderator Variable <sup>a</sup>                               | All Randomized Sample<br>(N=570)         |           |       |                            |               | Per Protocol Sample<br>(N=474)           |           |       |                            |            |
|---------------------------------------------------------------|------------------------------------------|-----------|-------|----------------------------|---------------|------------------------------------------|-----------|-------|----------------------------|------------|
|                                                               | Treatment by<br>Moderator<br>Interaction |           |       | Treatment<br>Effect        |               | Treatment by<br>Moderator<br>Interaction |           |       | Treatment<br>Effect        |            |
|                                                               | F                                        | DF        | P     | Odds<br>Ratio <sup>b</sup> | 95% CI        | F                                        | DF        | p     | Odds<br>Ratio <sup>b</sup> | 95% CI     |
| Age at onset any opioid use (years)<br>(Mean (SD))=21.3 (7.1) | 0.26                                     | 1,<br>559 | 0.611 |                            |               | 2.34                                     | 1,<br>463 | 0.127 |                            |            |
| at 14.2                                                       |                                          |           |       | 1.58                       | 0.96,<br>2.58 |                                          |           |       | 1.16                       | 0.69, 1.95 |
| at 21.3                                                       |                                          |           |       | 1.44                       | 1.02,<br>2.03 |                                          |           |       | 0.86                       | 0.59, 1.24 |
| at 28.5                                                       |                                          |           |       | 1.32                       | 0.81,<br>2.13 |                                          |           |       | 0.63                       | 0.37, 1.10 |
| Age at onset heroin use (years)<br>(Mean (SD))=24.6 (7.5)     | 0.01                                     | 1,<br>505 | 0.906 |                            |               | 0.37                                     | 1,<br>414 | 0.542 |                            |            |
| at 17.2                                                       |                                          |           |       | 1.40                       | 0.83,<br>2.36 |                                          |           |       | 0.93                       | 0.53, 1.62 |
| at 24.6                                                       |                                          |           |       | 1.37                       | 0.95,<br>1.97 |                                          |           |       | 0.82                       | 0.55, 1.21 |
| at 32.1                                                       |                                          |           |       | 1.34                       | 0.80,<br>2.24 |                                          |           |       | 0.73                       | 0.41, 1.27 |
| Duration of opioid use (years)<br>(Mean (SD))=12.5 (9.0)      | 2.19                                     | 1,<br>559 | 0.140 |                            |               | 2.35                                     | 1,<br>463 | 0.126 |                            |            |
| at 3.5                                                        |                                          |           |       | 1.12                       | 0.69,<br>1.84 |                                          |           |       | 0.66                       | 0.39, 1.12 |
| at 12.5                                                       |                                          |           |       | 1.46                       | 1.03,<br>2.06 |                                          |           |       | 0.89                       | 0.61, 1.28 |
| at 21.5                                                       |                                          |           |       | 1.90                       | 1.17,<br>3.09 |                                          |           |       | 1.18                       | 0.70, 1.99 |
| <b>Past Treatment History</b>                                 |                                          |           |       |                            |               |                                          |           |       |                            |            |
| Current treatment is first treatment in lifetime              | 2.50                                     | 1,<br>559 | 0.114 |                            |               | 2.35                                     | 1,<br>463 | 0.126 |                            |            |
| No                                                            |                                          |           |       | 1.78                       | 1.16,<br>2.75 |                                          |           |       | 1.09                       | 0.69, 1.74 |
| Yes                                                           |                                          |           |       | 1.01                       | 0.57,<br>1.77 |                                          |           |       | 0.60                       | 0.33, 1.10 |
| Any past treatment successful                                 | 0.56                                     | 1,<br>559 | 0.454 |                            |               | 0.11                                     | 1,<br>463 | 0.737 |                            |            |
| No                                                            |                                          |           |       | 1.28                       | 0.83,<br>1.98 |                                          |           |       | 0.82                       | 0.51, 1.32 |
| Yes                                                           |                                          |           |       | 1.68                       | 0.96,<br>2.93 |                                          |           |       | 0.94                       | 0.52, 1.69 |
| Past methadone or buprenorphine treatment<br>successful       | 0.89                                     | 1,<br>559 | 0.347 |                            |               | 0.47                                     | 1,<br>463 | 0.493 |                            |            |



| Moderator Variable <sup>a</sup>                      | All Randomized Sample<br>(N=570)         |           |       |                            |               | Per Protocol Sample<br>(N=474)           |           |       |                            |            |
|------------------------------------------------------|------------------------------------------|-----------|-------|----------------------------|---------------|------------------------------------------|-----------|-------|----------------------------|------------|
|                                                      | Treatment by<br>Moderator<br>Interaction |           |       | Treatment<br>Effect        |               | Treatment by<br>Moderator<br>Interaction |           |       | Treatment<br>Effect        |            |
|                                                      | F                                        | DF        | P     | Odds<br>Ratio <sup>b</sup> | 95% CI        | F                                        | DF        | p     | Odds<br>Ratio <sup>b</sup> | 95% CI     |
| Chronic pain longer than 6 months                    | 0.04                                     | 1,<br>558 | 0.841 |                            |               | <.01                                     | 1,<br>463 | 0.951 |                            |            |
| No                                                   |                                          |           |       | 1.46                       | 1.01,<br>2.10 |                                          |           |       | 0.87                       | 0.59, 1.29 |
| Yes                                                  |                                          |           |       | 1.31                       | 0.50,<br>3.46 |                                          |           |       | 0.90                       | 0.32, 2.51 |
| Pain discomfort moderate or extreme (EuroQoL)        | 0.09                                     | 1,<br>559 | 0.760 |                            |               | 0.16                                     | 1,<br>463 | 0.690 |                            |            |
| None                                                 |                                          |           |       | 1.37                       | 0.81,<br>2.32 |                                          |           |       | 0.97                       | 0.55, 1.70 |
| Moderate/Extreme                                     |                                          |           |       | 1.53                       | 0.97,<br>2.40 |                                          |           |       | 0.83                       | 0.51, 1.35 |
| <b>Criminal Justice Status</b>                       |                                          |           |       |                            |               |                                          |           |       |                            |            |
| Current probation or parole                          | 0.09                                     | 1,<br>558 | 0.767 |                            |               | 1.34                                     | 1,<br>462 | 0.248 |                            |            |
| No                                                   |                                          |           |       | 1.43                       | 0.98,<br>2.07 |                                          |           |       | 0.79                       | 0.53, 1.18 |
| Yes                                                  |                                          |           |       | 1.65                       | 0.67,<br>4.09 |                                          |           |       | 1.45                       | 0.56, 3.80 |
| <b>Living Situation</b>                              |                                          |           |       |                            |               |                                          |           |       |                            |            |
| Current homelessness                                 | 14.59                                    | 1,<br>559 | <.001 |                            |               | 9.49                                     | 1,<br>463 | 0.002 |                            |            |
| No                                                   |                                          |           |       | 2.15                       | 1.44,<br>3.21 |                                          |           |       | 1.24                       | 0.80, 1.90 |
| Yes                                                  |                                          |           |       | 0.45                       | 0.22,<br>0.90 |                                          |           |       | 0.32                       | 0.15, 0.68 |
| Any friends/family with alcohol problems             | 0.06                                     | 1,<br>554 | 0.809 |                            |               | 0.01                                     | 1,<br>460 | 0.917 |                            |            |
| No                                                   |                                          |           |       | 1.50                       | 0.92,<br>2.45 |                                          |           |       | 0.90                       | 0.53, 1.52 |
| Yes                                                  |                                          |           |       | 1.38                       | 0.85,<br>2.23 |                                          |           |       | 0.86                       | 0.51, 1.45 |
| Any friends/family with heroin/other opioid problems | 2.88                                     | 1,<br>554 | 0.090 |                            |               | 1.23                                     | 1,<br>460 | 0.269 |                            |            |
| No                                                   |                                          |           |       | 2.15                       | 1.21,<br>3.81 |                                          |           |       | 1.17                       | 0.63, 2.16 |
| Yes                                                  |                                          |           |       | 1.15                       | 0.75,<br>1.78 |                                          |           |       | 0.76                       | 0.48, 1.21 |
| Any friends/family with illicit drug problems        | 2.95                                     | 1,<br>554 | 0.086 |                            |               | 1.38                                     | 1,<br>460 | 0.241 |                            |            |

| Moderator Variable <sup>a</sup>                | All Randomized Sample<br>(N=570)         |           |       |                            |               | Per Protocol Sample<br>(N=474)           |           |       |                            |            |
|------------------------------------------------|------------------------------------------|-----------|-------|----------------------------|---------------|------------------------------------------|-----------|-------|----------------------------|------------|
|                                                | Treatment by<br>Moderator<br>Interaction |           |       | Treatment<br>Effect        |               | Treatment by<br>Moderator<br>Interaction |           |       | Treatment<br>Effect        |            |
|                                                | F                                        | DF        | P     | Odds<br>Ratio <sup>b</sup> | 95% CI        | F                                        | DF        | p     | Odds<br>Ratio <sup>b</sup> | 95% CI     |
| No                                             |                                          |           |       | 2.19                       | 1.19,<br>4.03 |                                          |           |       | 1.20                       | 0.63, 2.30 |
| Yes                                            |                                          |           |       | 1.15                       | 0.76,<br>1.74 |                                          |           |       | 0.75                       | 0.48, 1.17 |
| Living with a person with alcohol use disorder | 2.22                                     | 1,<br>559 | 0.137 |                            |               | 1.23                                     | 1,<br>463 | 0.269 |                            |            |
| No                                             |                                          |           |       | 1.59                       | 1.10,<br>2.29 |                                          |           |       | 0.95                       | 0.64, 1.41 |
| Yes                                            |                                          |           |       | 0.71                       | 0.27,<br>1.92 |                                          |           |       | 0.51                       | 0.18, 1.43 |
| Living with a person using illicit drugs       | 0.13                                     | 1,<br>559 | 0.714 |                            |               | 0.07                                     | 1,<br>463 | 0.786 |                            |            |
| No                                             |                                          |           |       | 1.50                       | 1.02,<br>2.21 |                                          |           |       | 0.90                       | 0.59, 1.37 |
| Yes                                            |                                          |           |       | 1.28                       | 0.61,<br>2.69 |                                          |           |       | 0.80                       | 0.36, 1.75 |
| <b>Medication Preference</b>                   |                                          |           |       |                            |               |                                          |           |       |                            |            |
| No strong medication preference:               | 2.14                                     | 2,<br>556 | 0.118 |                            |               | 2.34                                     | 2,<br>461 | 0.097 |                            |            |
| Disagree                                       |                                          |           |       | 2.04                       | 1.06,<br>3.95 |                                          |           |       | 1.33                       | 0.66, 2.67 |
| Neutral                                        |                                          |           |       | 1.71                       | 0.97,<br>3.01 |                                          |           |       | 1.02                       | 0.56, 1.86 |
| Agree                                          |                                          |           |       | 0.87                       | 0.48,<br>1.56 |                                          |           |       | 0.49                       | 0.25, 0.94 |
| Prefer to receive buprenorphine-naloxone:      | 1.05                                     | 2,<br>556 | 0.351 |                            |               | 0.27                                     | 2,<br>461 | 0.760 |                            |            |
| Disagree                                       |                                          |           |       | 1.02                       | 0.52,<br>2.03 |                                          |           |       | 0.79                       | 0.38, 1.67 |
| Neutral                                        |                                          |           |       | 1.36                       | 0.81,<br>2.29 |                                          |           |       | 0.80                       | 0.46, 1.40 |
| Agree                                          |                                          |           |       | 2.01                       | 1.08,<br>3.74 |                                          |           |       | 1.08                       | 0.56, 2.09 |
| Prefer to receive extended-release naltrexone: | 0.79                                     | 2,<br>556 | 0.454 |                            |               | 0.60                                     | 2,<br>461 | 0.549 |                            |            |
| Disagree                                       |                                          |           |       | 1.74                       | 0.82,<br>3.68 |                                          |           |       | 1.00                       | 0.46, 2.20 |
| Neutral                                        |                                          |           |       | 1.62                       | 0.99,<br>2.63 |                                          |           |       | 0.99                       | 0.59, 1.66 |
| Agree                                          |                                          |           |       | 1.02                       | 0.54,<br>1.93 |                                          |           |       | 0.63                       | 0.31, 1.27 |



| Moderator Variable <sup>a</sup>                                          | All Randomized Sample<br>(N=570)         |        |       |                            |            | Per Protocol Sample<br>(N=474)           |        |       |                            |            |
|--------------------------------------------------------------------------|------------------------------------------|--------|-------|----------------------------|------------|------------------------------------------|--------|-------|----------------------------|------------|
|                                                                          | Treatment by<br>Moderator<br>Interaction |        |       | Treatment<br>Effect        |            | Treatment by<br>Moderator<br>Interaction |        |       | Treatment<br>Effect        |            |
|                                                                          | F                                        | DF     | P     | Odds<br>Ratio <sup>b</sup> | 95% CI     | F                                        | DF     | p     | Odds<br>Ratio <sup>b</sup> | 95% CI     |
| <b>Opioid Withdrawal</b>                                                 |                                          |        |       |                            |            |                                          |        |       |                            |            |
| Typical discomfort level during past episodes of opioid withdrawal       | 2.14                                     | 1, 557 | 0.144 |                            |            | 0.08                                     | 1, 463 | 0.782 |                            |            |
| 0-7 (0="none", 1="little discomfort")                                    |                                          |        |       | 1.15                       | 0.72, 1.83 |                                          |        |       | 0.84                       | 0.52, 1.38 |
| 8-10 (10="almost unbearable")                                            |                                          |        |       | 1.93                       | 1.15, 3.22 |                                          |        |       | 0.94                       | 0.54, 1.64 |
| Subjective Opioid Withdrawal Scale (range: 0-64) (Mean (SD)=15.6 (13.3)) | 4.71                                     | 1, 559 | 0.030 |                            |            | 4.42                                     | 1, 463 | 0.036 |                            |            |
| at 2.3                                                                   |                                          |        |       | 0.98                       | 0.61, 1.60 |                                          |        |       | 0.59                       | 0.35, 0.99 |
| at 15.6                                                                  |                                          |        |       | 1.45                       | 1.03, 2.05 |                                          |        |       | 0.87                       | 0.60, 1.26 |
| at 28.8                                                                  |                                          |        |       | 2.15                       | 1.30, 3.54 |                                          |        |       | 1.30                       | 0.77, 2.20 |
| <b>Timing of Randomization</b>                                           | 1.11                                     | 1, 559 | 0.291 |                            |            | 9.79                                     | 1, 463 | 0.002 |                            |            |
| Early (within 3 days of last opioid exposure)                            |                                          |        |       | 1.14                       | 0.64, 2.01 |                                          |        |       | 0.37                       | 0.19, 0.72 |
| Late (>3 days of last opioid exposure)                                   |                                          |        |       | 1.67                       | 1.08, 2.56 |                                          |        |       | 1.33                       | 0.85, 2.10 |
| <b>Severity</b>                                                          | 1.40                                     | 1, 559 | 0.238 |                            |            | 1.23                                     | 1, 463 | 0.269 |                            |            |
| Low (non-intravenous use or intravenous use at <6 bags/day)              |                                          |        |       | 1.71                       | 1.10, 2.65 |                                          |        |       | 1.03                       | 0.64, 1.66 |
| High (intravenous use at ≥ 6 bags/day)                                   |                                          |        |       | 1.12                       | 0.65, 1.93 |                                          |        |       | 0.68                       | 0.38, 1.21 |

<sup>a</sup>Moderator variables with treatment by moderator interaction p<.05 are presented in Table 2 for the All Randomized sample and Table 3 for the Per Protocol sample in the main paper.

<sup>b</sup>Odds-ratio > 1.0 favors buprenorphine-naloxone; Odds-ratio < 1.0 favors extended-release naltrexone)
